# Supplementary material for: Facile synthesis of carbon nitride micro-/nanoclusters with photocatalytic activity for hydrogen evolution
Source: Royal Society of Chemistry journal article supplement (doi:10.1039/c3ra44490b), 2013-01-01
Supplement: c3ra44490b.pdf [file c3ra44490b.pdf]

# Supporting Information

## Facile synthesis of carbon nitride micro-/nanoclusters with photocatalytic activity for hydrogen evolution

**Jian Liu<sup>1\*</sup>, Jianhui Huang<sup>2</sup>, Dariya Dontsova<sup>1</sup>, Markus Antonietti<sup>1</sup>**

<sup>1</sup>Department of Colloid Chemistry, Max Planck Institute of Colloids and Interfaces, 14424 Potsdam, Germany

<sup>2</sup>Environmental and Life Sciences Department, Putian University, Putian 351100, P.R.China

E-Mail: [Jian.Liu@mpikg.mpg.de](mailto:Jian.Liu@mpikg.mpg.de)

## Experimental section

**Materials.** Cyanamide, Celatom FW-14,  $\text{NH}_4\text{HF}_2$  and Triethanolamine were obtained from Sigma-Aldrich and used without further treatment.

**Synthesis.** Carbon nitride micro-/nanoclusters were synthesized through a solid “incipient wetness impregnation” method. 1 g of Celatom FW-14 and certain amount of cyanamide were mixed evenly in the mortar and transferred into the crucibles with lid and heated under  $\text{N}_2$  atmosphere to the desired temperature (450~650 °C, ramp rate 2.3 °C·min<sup>-1</sup>) and kept at the temperature for another 4 hours. For the removal of diatom, the resultant yellow powder is treated with 4 M  $\text{NH}_4\text{HF}_2$  solution with stirring for 24 hours. The dispersion is then filtered; the precipitate is copiously rinsed with deionized water and ethanol. After filtering procedure, the yellow powder is dried under vacuum at 60 °C overnight.

**Characterizations.** XRD measurements were performed on a D8 Diffractometer from Bruker instruments (Cu  $\text{K}\alpha$  radiation,  $\lambda = 0.154$  nm) equipped with a scintillation counter.  $\text{N}_2$  sorption experiments were done with a Quantachrome Autosorb-1 at liquid nitrogen temperature. TEM images were taken on Philips CM200 FEG (Field Emission Gun), operated at an acceleration voltage of 120 kV. SEM measurement was performed on a LEO 1550 Gemini instrument.

**Photocatalytic hydrogen evolution on carbon nitride micro-/nanoclusters.** In a typical experiment, 50 mg carbon nitride material was placed in the photoreactor (equipped with a magnetic stirrer) then the reactor was evacuated and refilled with argon for five times. Then 38 mL of aqueous TEOA solution (10 vol% TEOA) containing the platinum precursor (Pt metal content: 3% weight of carbon nitride) was added under argon flow. The set-up is equipped with a thermostat and stirring plate.  $\text{H}_2\text{O}$  and TEOA were pretreated before use.  $\text{H}_2\text{O}$  was firstly degassed for 1 h under vacuum in an ultrasonic bath and secondly purged with argon for 1 h. TEOA was purged for 1 h with argon. After the reaction, a sample of the headspace was analyzed with GC for hydrogen content.

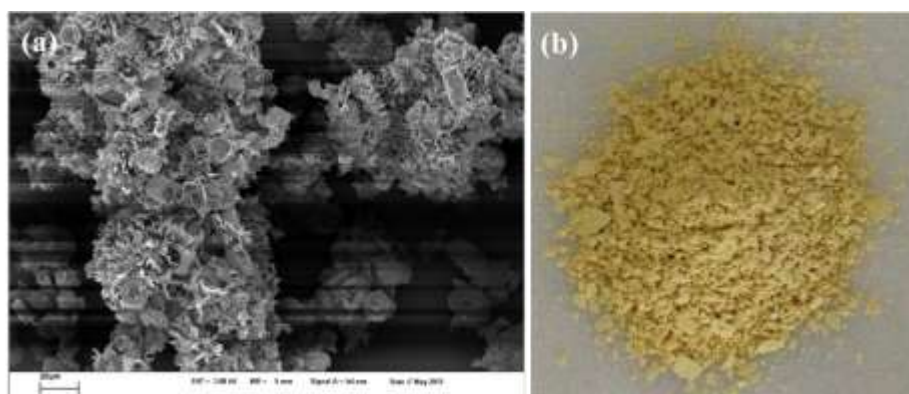

**Figure S1.** (a) Large area overview of CNMN<sub>1</sub>-600 material, demonstrating the homogeneous distribution of micro-/nanoclusters. (b) The optical digital image shows the free flowing property of obtained materials.

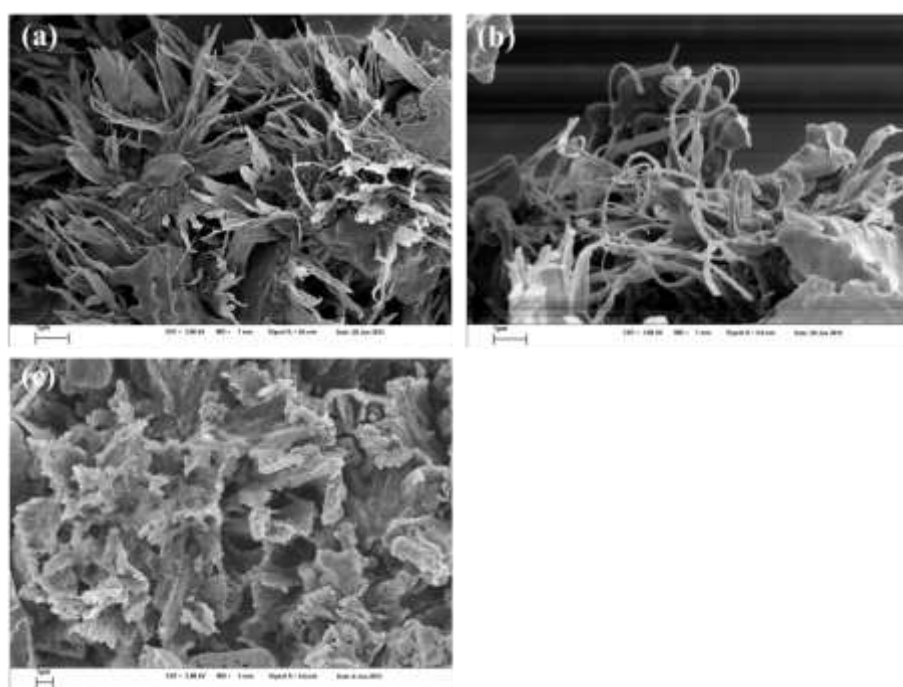

**Figure S2.** (a) SEM image of micro-/nanoclusters grown from carbon nitride coating on the diatom frustule; (b) SEM image of curved carbon nitride nanowire; (c) SEM image of free standing micro-/nanoclusters after removal of diatom substrate.

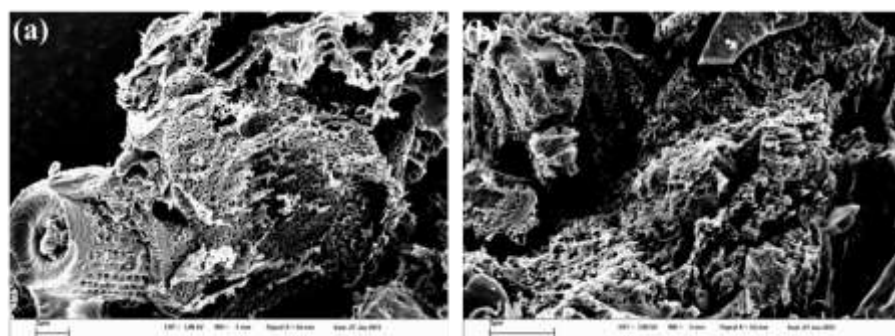

**Figure S3.** SEM images of CNMN<sub>2</sub>-600 (a) and CNMN<sub>3</sub>-600 (b). The high cyanamide content leads to particles intergrown after condensation instead of free flowing. Some porous structures could still be clearly observed from the images.

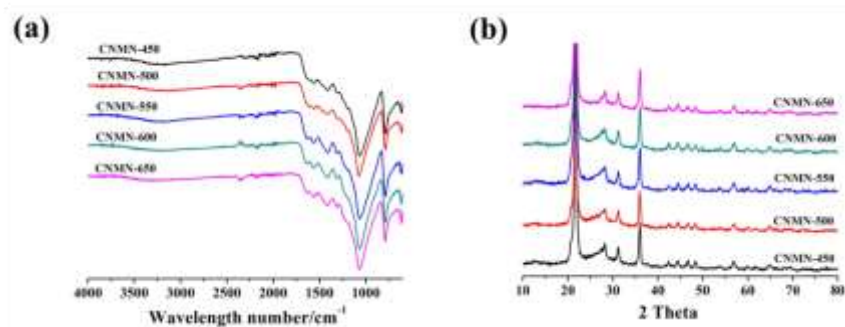

**Figure S4.** XRD (a) and FTIR (b) of carbon nitride/diatom composites under different calcination temperatures for CNMN<sub>1</sub>-T.

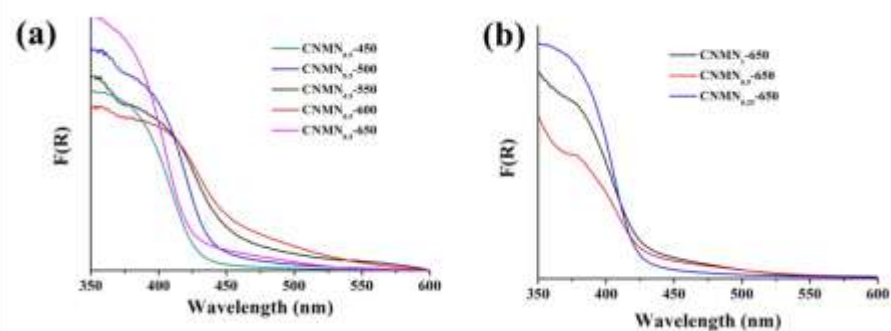

**Figure S5.** Diffuse reflectance spectra of CNMN<sub>0.5</sub>-T (a) and CNMN<sub>x</sub>-650 (b).

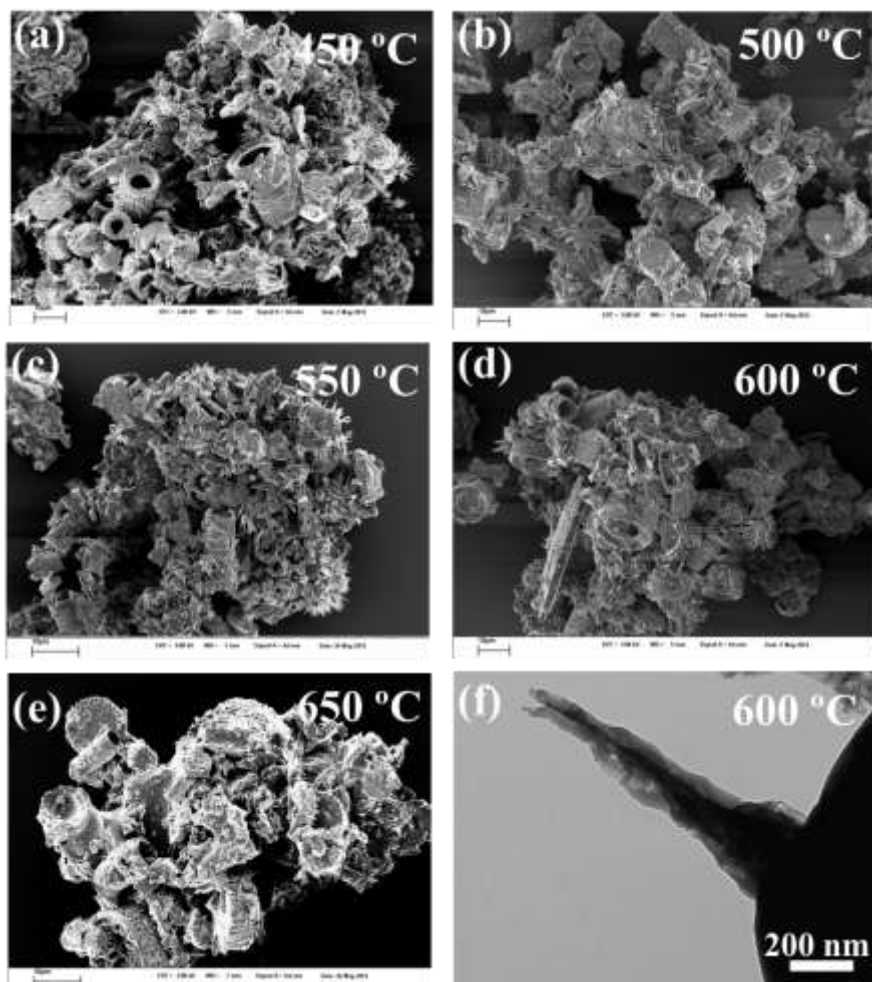

**Figure S6.** SEM images of CNMN<sub>0.25</sub>-T, demonstrating the nanowire morphology prevails across different condensation temperature (a-d) except 650 °C condition (e). TEM image of CNMN<sub>0.25</sub>-600 in (e) shows the nanowire grows outside from the diatom substrate.

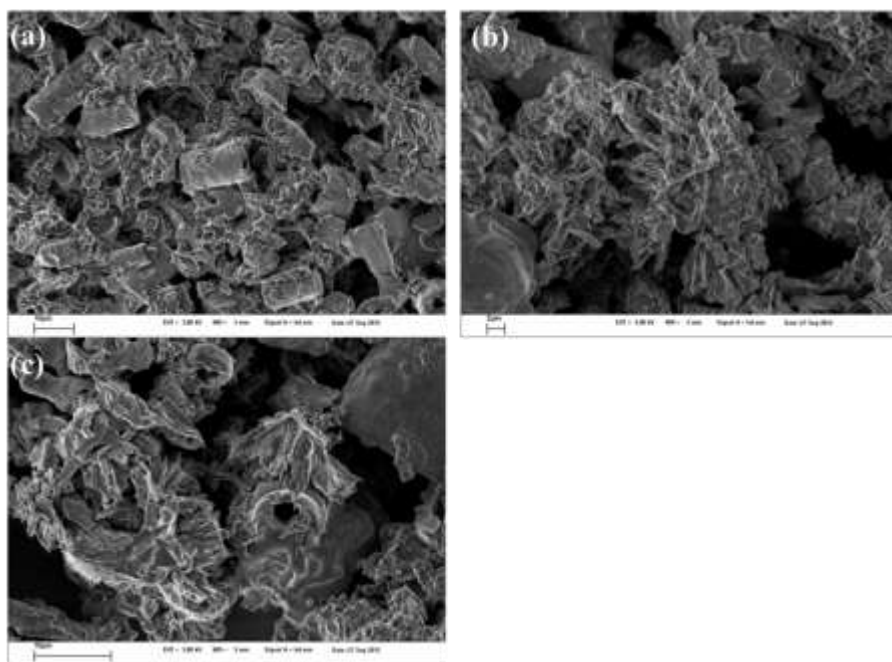

**Figure S7.** SEM of recycled CNMN. (a) CNMN<sub>0.5</sub>-600; (b) CNMN<sub>0.5</sub>-600; CNMN<sub>1</sub>-600.

|                          | Color      | Forward Voltage Vf<br>(V) |      |      | Test<br>Current<br>(mA) | Typical<br>Coefficient<br>of Forward<br>Voltage<br>(mV/°C)<br>$\Delta f/\Delta j$ | Power<br>(Typ)<br>(W) | Efficacy<br>(Typ at T <sub>j</sub><br>25°C)<br>(lm/W) |
|--------------------------|------------|---------------------------|------|------|-------------------------|-----------------------------------------------------------------------------------|-----------------------|-------------------------------------------------------|
|                          |            | Min                       | Typ  | Max  |                         |                                                                                   |                       |                                                       |
| <b>BXRA-50C5300-H-00</b> | Cool white | 21.9                      | 24.4 | 26.8 | 2100                    | -8 to -24                                                                         | 51                    | 117                                                   |

**Table S1.** Electrical characteristics of white LED lamp employed in the photocatalytic reaction.
